# Supplementary material for: SARS-CoV-2 recruits a haem metabolite to evade antibody immunity
Source: PubMed Central journal article supplement — medRxiv. 2021 Jan 26:2021.01.21.21249203. Preprint. [Version 1] doi: 10.1101/2021.01.21.21249203 (PMC7852234; doi:10.1101/2021.01.21.21249203), 2021-01-26
Supplement: NIHPP2021.01.21.21249203-supplement-1.pdf [file NIHPP2021.01.21.21249203-supplement-1.pdf]

**Figure S1. UV-visible light absorption spectral properties of coronaviral spike antigen constructs.** (A) *Left:* Analysis of recombinant coronaviral spike and S1 constructs used in this work by SDS PAGE. Each lane contained 5 µg of purified recombinant protein; the gel was stained with Coomassie Blue. *Middle:* A representative SARS-CoV-2 S1 sample at ~4 mg/ml in a centrifugal concentrator. *Right:* Light absorbance spectra of four independent SARS-CoV-2 S1 batches (250-800 nm). (B-E) Spectra of stabilised trimeric SARS-CoV-2 spike ectodomain (residues 1-1208), NTD (1-310), RBD (319-541), and biliverdin (B); SARS-CoV-1 S1 (residues 1-518), HCoV NL63 S1 (residues 1-664) and OC43 S1 (1-665) (C); SARS-CoV-2 S1 purified under acidic conditions in sodium acetate pH 5.2 or dialysed overnight against suspension of activated charcoal. Note the retention of biliverdin in dialysed sample, consistent with high affinity of the interaction at pH 8.0 (D); H207A, R190K and N121Q SARS-CoV-2 S1 (E), compared to a representative spectrum of WT SARS-CoV-2 S1 purified under standard conditions, shows as black lines. Spectra were acquired from proteins diluted to 1-1.2 mg/ml in HBSE buffer and normalised to absorption at 278 nm.

**Figure S2. Identification biliverdin IX $\alpha$  by mass spectrometry.** Positive-mode ion chromatograms of biliverdin XI $\alpha$  standard and of the pigment isolated from recombinant S1 (*top left*) and structure proposal for some of the fragment ions of biliverdin XI $\alpha$  (*top*

*right*). The bottom panels show comparison of positive and negative MS2 spectra of the ions corresponding to biliverdin IX $\alpha$  in a standard (*upper*) and in recombinant S1 (*lower*). Black diamonds indicate expected positions of intact ions.

**Figure S3. Representative SPR sensorgrams (A-I), estimates of equilibrium binding affinities (J) and melting point analysis (K).** The sensorgrams were recorded with WT (A-E), R190K (F), or N121Q (G-H) SARS-CoV-2 S1, or WT SARS-CoV-1 S1 (I). The proteins were immobilised on a sensor chip and binding and dissociation of biliverdin IX $\alpha$  (A, E-G, I), bilirubin (B, H), hemin (C), and protoporphyrin IX (D) was measured. The analytes were injected at indicated concentrations at pH 8.0 (A-D, F-I) or pH 5.0 (E). The plots in panel H show representative normalised equilibrium binding curves; continuous black lines indicate fitting curves. Estimated  $K_{as}$  values are given in Table S1. Panel K shows melting behaviour of isolated SARS-CoV-2 NTD diluted to 30  $\mu$ M in HBSE buffer (150 mM NaCl, 1 mM EDTA, 20 mM HEPES-NaOH, pH8.0) in the absence or presence of 100-1,000  $\mu$ M biliverdin. The vertical axis corresponds to the first derivative of the ratios of fluorescence intensities measured at 350 and 330 nm wavelengths; the resulting melting points along with standard deviations ( $n = 4$ ) are given in the inset.

**Figure S4. Cryo-EM image processing for the SARS-CoV-2 spike-biliverdin complex.** (A) Representative 2D classes corresponding to trimeric (*left*) and dissociated (*right*) spike single particles. (B) Trimeric spikes identified by 2D classification (371,422 particles) were subjected to 3D classification in Relion-3.1 into 11 classes. Particles belonging to 3RBDs-down and 1RBD-up forms of the spike (indicated with red and blue boxes, respectively) were combined and used for 3D reconstruction in CryoSPARC-2. (C) Fourier shell

correlations for the final reconstructions from CryoSPARC-2. **(D)** Maps colored by local resolution, as shown on the inset.

**Figure S5. Stereo views of the cryo-EM and crystal structure density maps.** Panel **A** shows the cryo-EM map of the 3RBD-down spike with biliverdin (*top*) and *2Fo-Fc* map of NTD-biliverdin complex crystal structure (*bottom*). The crystal structure is shown as sticks, coloured as in Fig. 1. Selected amino acid residues are indicated on the black-and-white image (*bottom right*). Electron density is contoured at r.m.s.d. of 1.0. Panel **B** shows cryo-EM map of the spike-Fab complex. Protein chains are depicted as ribbons, colored as in Fig. 4. Selected side chains are shown as sticks. Positions of selected residues, the gate and the lip are indicated on the back-and-white images to the right.

**Figure S6. Evidence of biliverdin presence in previous SARS-CoV-2 spike cryo-EM reconstructions.** Four published structures (*14-17*) with map features associated with the NTD and not explained by the original models are shown as chicken wire. In each case, a biliverdin molecule was placed by superposition of the NTD-biliverdin complex crystal structure.

**Figure S7. Infectivity of lentiviral vectors pseudotyped with SARS-CoV-2 spike with and without indicated mutations within the NTD on Vero (*left*) and Huh7 (*right*) cells.** Infectivity is expressed as number of infected cells relative to the amount of RT-activity associated to the virus inoculum. Bars represent means and data from individual measurements ( $n = 4$ ) are shown with dots. Error bars represent standard deviation of the mean calculated from the quadruplicate determinations.

**Figure S8.** (A) Gating strategy of HEK293T cells transfected to express WT spike or N121Q SARS-CoV-2 spike. Staining intensity was taken as the MFI of positively stained cells, represented by the rectangular gates. (B-C) MFI of IgM (B) and IgA (C) staining of HEK293T cells expressing WT or N121Q SARS-CoV-2 spike by individual patient sera in the absence or the presence of 10  $\mu$ M biliverdin. Each symbol represents an individual patient (n=17) and coloured dotted lines represent the linear regression for each spike variant. (D-E) Change in MFI caused by the addition of 10  $\mu$ M biliverdin, as percent of staining without biliverdin, for serum for IgM and IgA antibodies. Each pair of connected symbols represents an individual patient.

**Figure S9. Effect of biliverdin binding on reactivity of SARS-CoV-2 with convalescent sera.** IgG capture ELISA was performed with recombinant WT (biliverdin-depleted, red circles) or N121Q (blue circles) S1 antigen using sera from SARS-CoV-2 infected and convalescent individuals (n=91) in the presence (vertical axis) or absence (horizontal axis) of 10  $\mu$ M biliverdin. Dotted lines represent linear fit for each set (considering samples with OD values <2.5, n = 82); the grey line is the diagonal. The inset shows posterior probability density plots of values for pairwise contrasts ( $\pm$ biliverdin) for the WT and N121Q S1 proteins. Black dots indicate the median of the distribution, thick and thin line ranges correspond to the 85% and 95% highest density interval, respectively; the dotted vertical line indicates a zero difference. Antibodies binding to S1 epitopes, which are occluded within protein-protein interfaces of the full-length trimeric spike, contribute to the observed signal in this ELISA assay. Therefore, the signal differences ( $\pm$ biliverdin) are expected to be less pronounced than in the flow cytometry assay, which used the complete native spike (Fig. 2).

**Figure S10. Biliverdin decreases binding to SARS CoV-2 spike by a group of human monoclonal IgGs.** (A) Antibodies observed previously to bind to spike were titrated 6-fold and assayed by IgG ELISA for binding to WT S1 or N121Q S1. WT protein was prepared under acidic conditions to remove any co-purifying biliverdin, and was used in the absence (-biliverdin) or presence (+biliverdin) of 10  $\mu$ M exogenous biliverdin. Area under the curve (AUC) is shown for 38 IgG that bound to S1 (also see Figs 3A and 3C). AUC values are colour-coded as per the key. Fold change compared to WT S1 protein are reported. (B) IC<sub>50</sub> values in  $\mu$ g/ml calculated in Graphpad Prism are shown for each combination of IgG and viral preparation. The fold change column shows the decrease in IC<sub>50</sub> with BLV relative to either wild-type S pseudotyped or live virus. Colour-coding is indicated in the key.

**Figure S11. Cryo-EM image processing for the spike-Fab complex.** (A) Representative 2D classes corresponding to trimeric (*left*) and dissociated (*right*) spike single particles. (B) Trimeric spikes identified by 2D classification (709,127 particles) were subjected to 3D classification in Relion-3.1 into 16 classes. Particles belonging to a class corresponding to trimeric spike (1RBD-up) with single Fab bound (boxed) were used in final 3D reconstruction in CryoSPARC-2. (C) Fourier shell correlations for the final reconstructions from CryoSPARC-2. (D) Cryo-EM map colored by local resolution.

**Movie S1. Conformational changes in the NTD associated with binding neutralising antibody P008\_056.**

Figure 1

medRxiv preprint doi: <https://doi.org/10.1101/2021.01.21.21249203>; this version posted January 26, 2021. The copyright holder for this preprint (which was not certified by peer review) is the author/funder, who has granted medRxiv a license to display the preprint in perpetuity. It is made available under a CC-BY-NC-ND 4.0 International license.

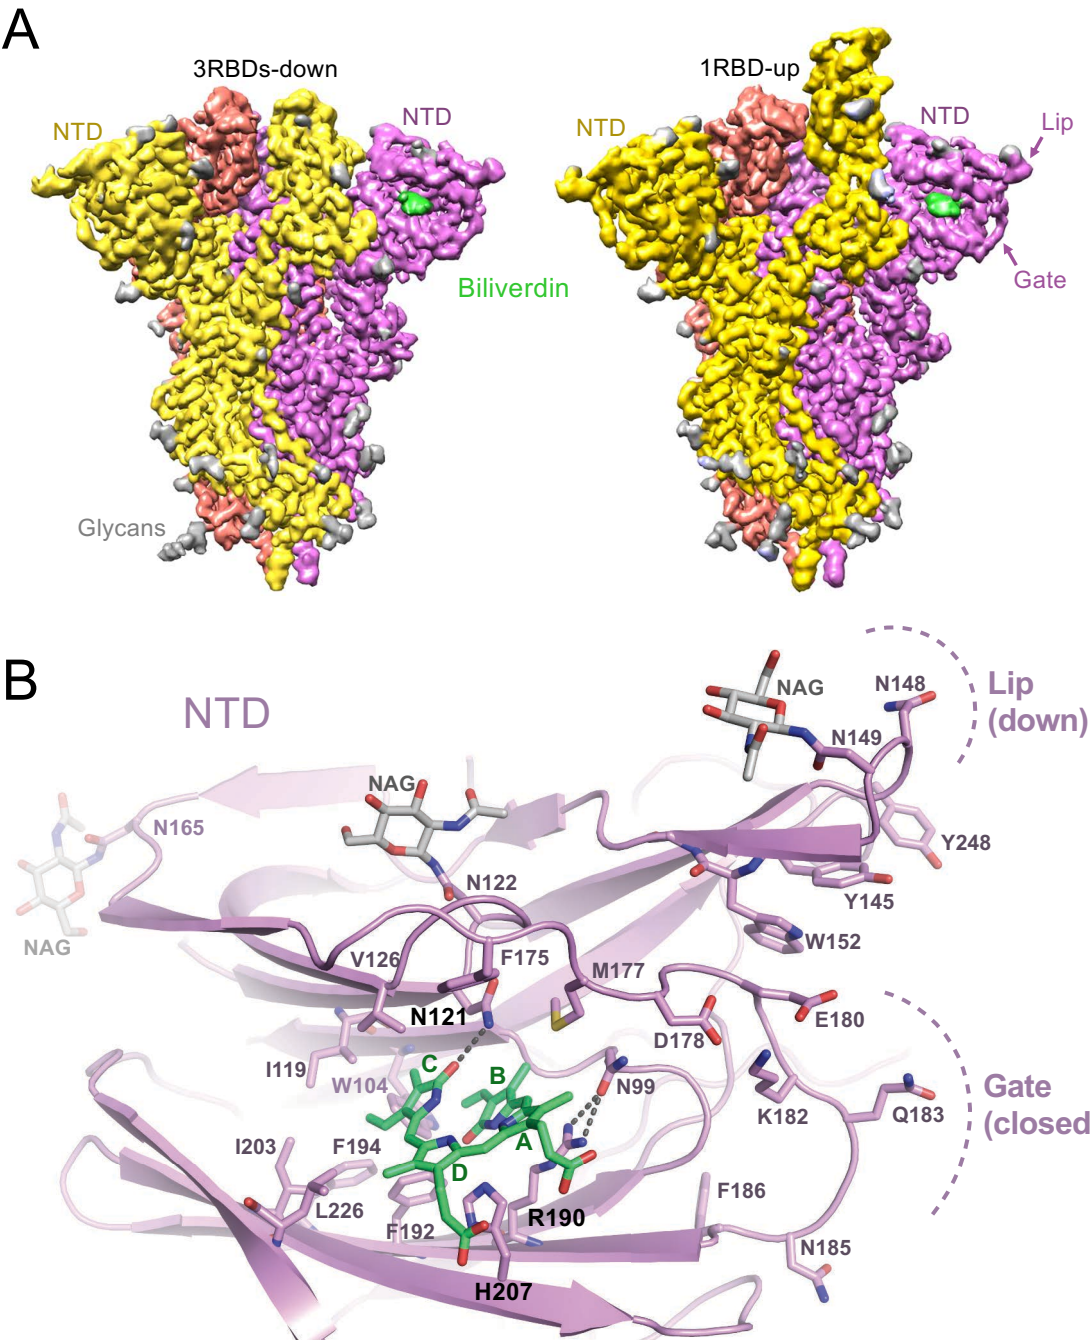

Figure 2

medRxiv preprint doi: <https://doi.org/10.1101/2021.01.21.21249203>; this version posted January 26, 2021. The copyright holder for this preprint (which was not certified by peer review) is the author/funder, who has granted medRxiv a license to display the preprint in perpetuity. It is made available under a CC-BY-NC-ND 4.0 International license.

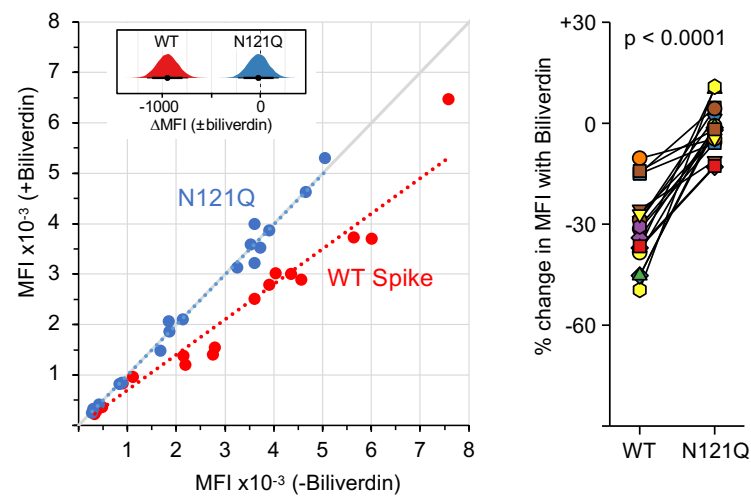

Figure 3

medRxiv preprint doi: <https://doi.org/10.1101/2021.01.21.21249203>; this version posted January 26, 2021. The copyright holder for this preprint (which was not certified by peer review) is the author/funder, who has granted medRxiv a license to display the preprint in perpetuity. It is made available under a CC-BY-NC-ND 4.0 International license.

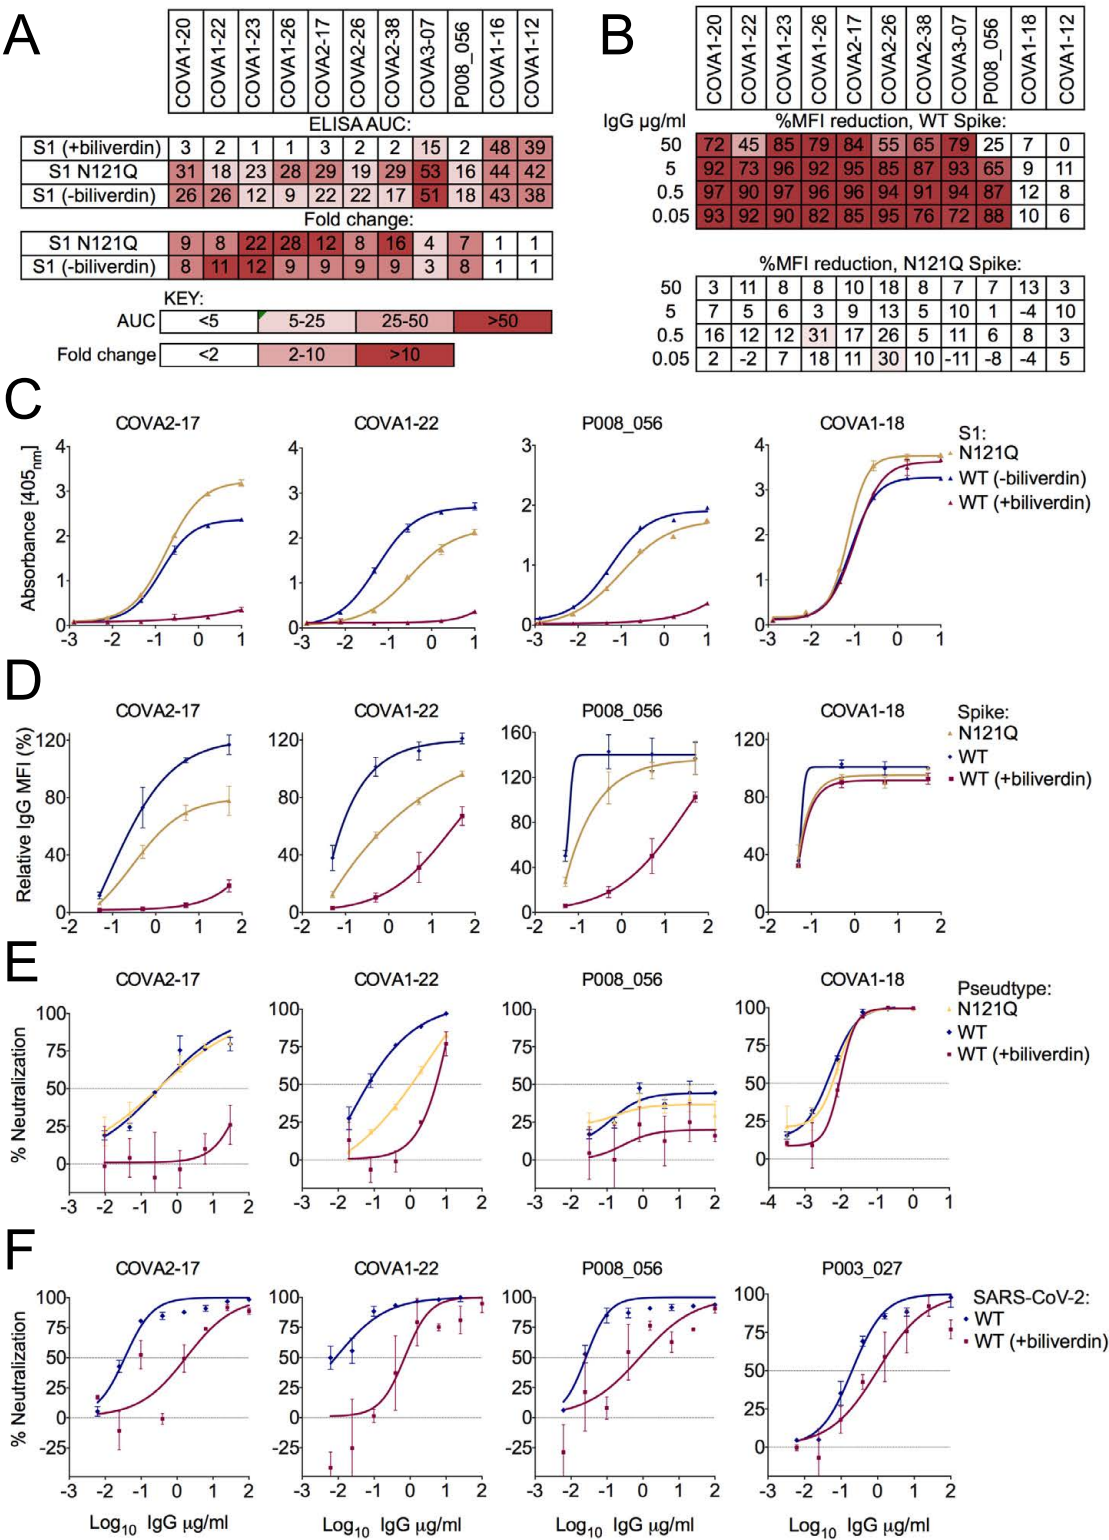

Figure 4

medRxiv preprint doi: <https://doi.org/10.1101/2021.01.21.21249203>; this version posted January 26, 2021. The copyright holder for this preprint (which was not certified by peer review) is the author/funder, who has granted medRxiv a license to display the preprint in perpetuity. It is made available under a CC-BY-NC-ND 4.0 International license.

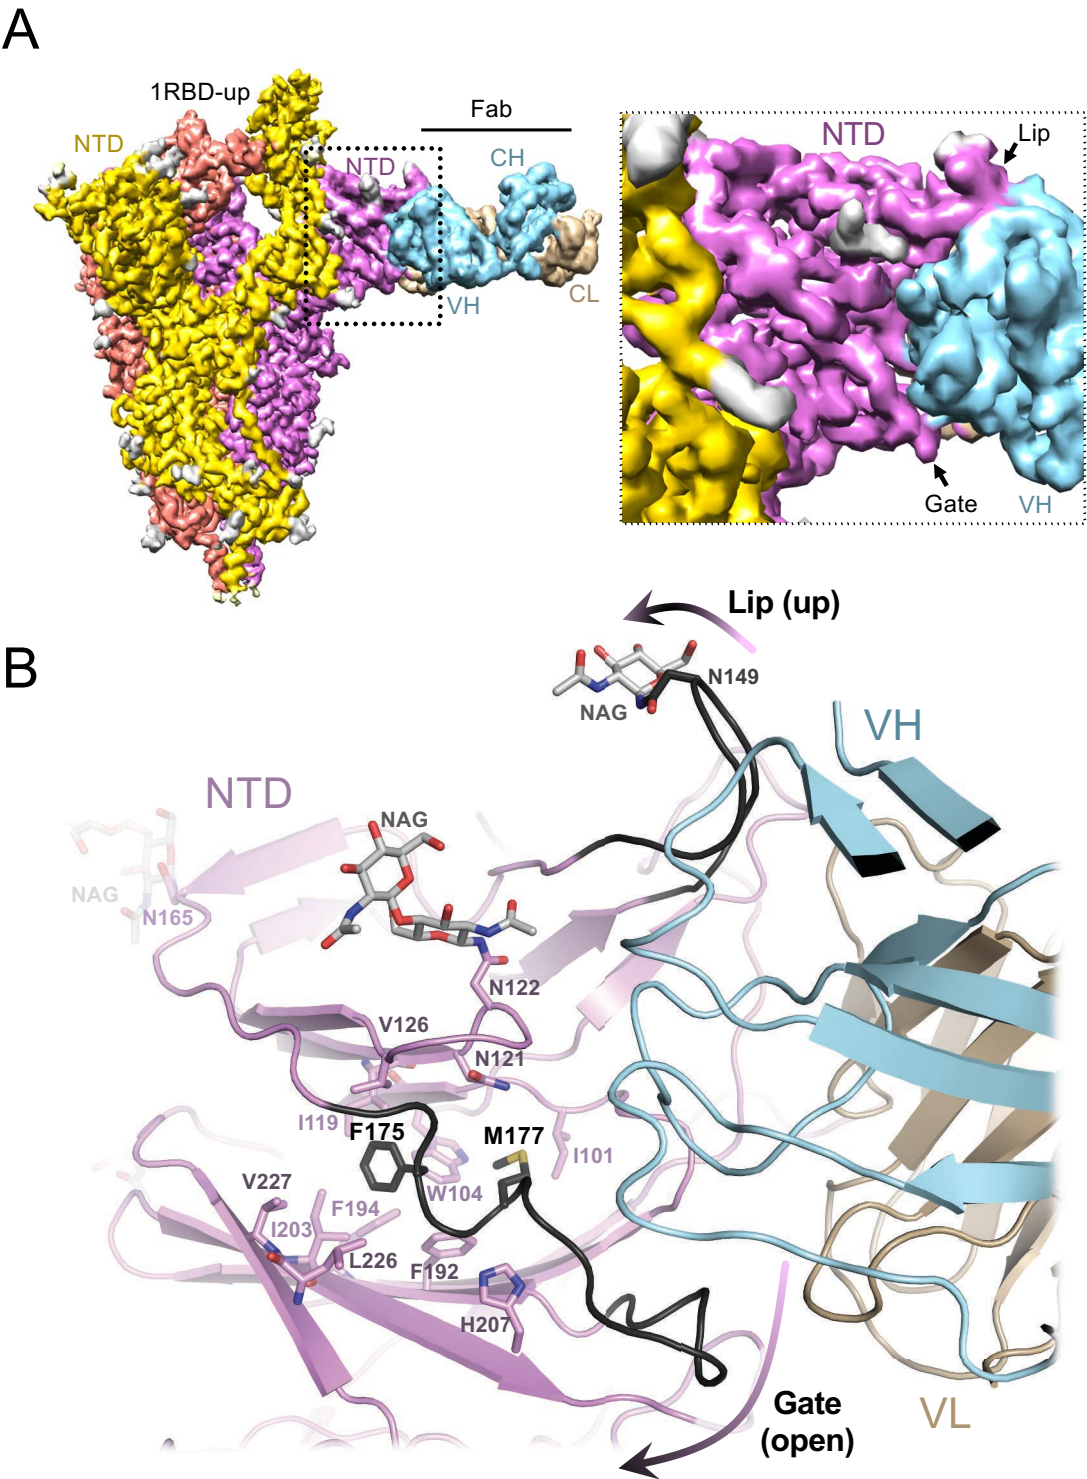

# Supplementary Figure 1

medRxiv preprint doi: <https://doi.org/10.1101/2021.01.21.21249203>; this version posted January 26, 2021. The copyright holder for this preprint (which was not certified by peer review) is the author/funder, who has granted medRxiv a license to display the preprint in perpetuity. It is made available under a CC-BY-NC-ND 4.0 International license.

A

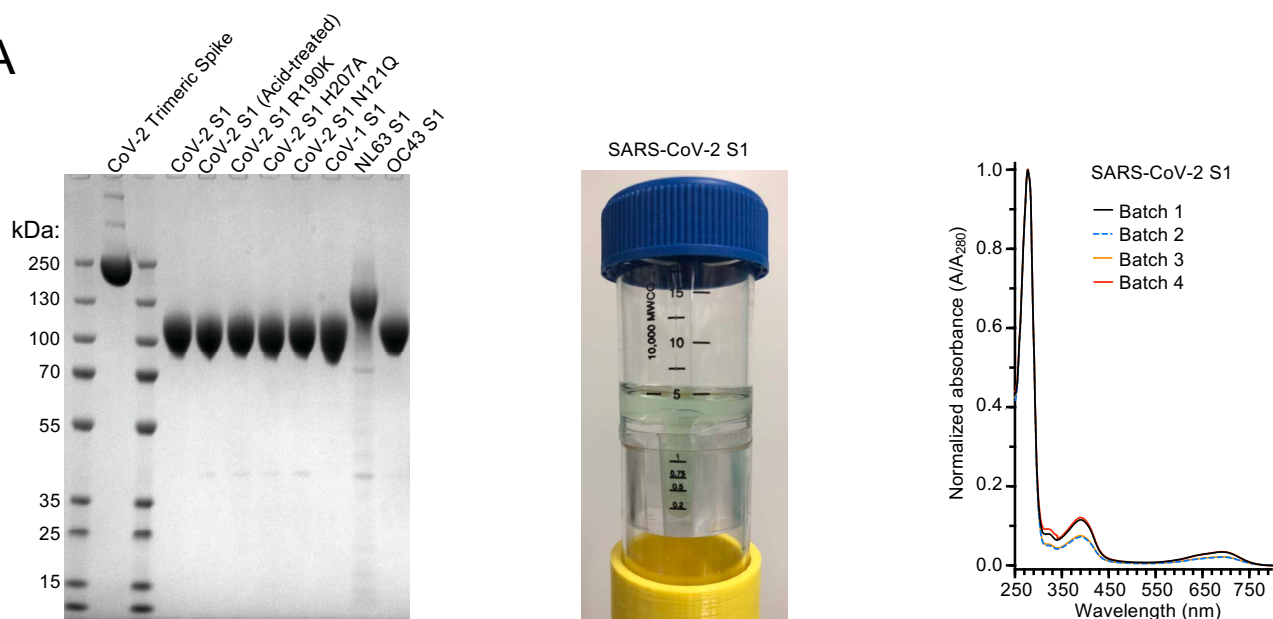

B

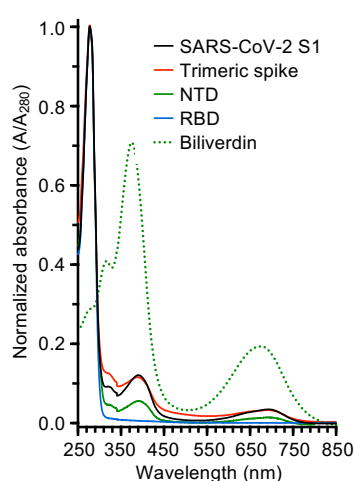

C

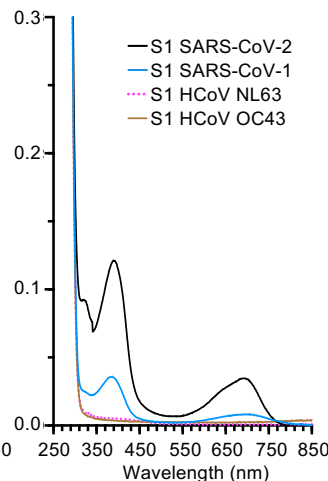

D

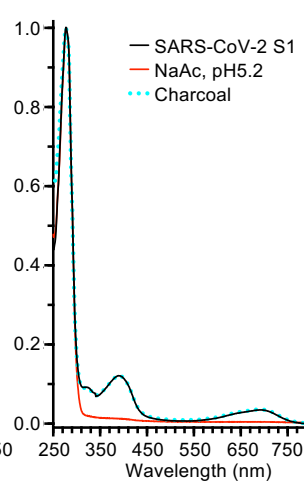

E

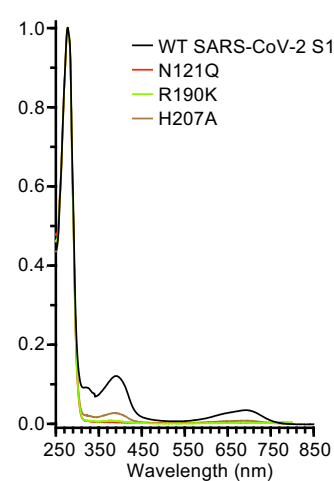

Supplementary Figure 2

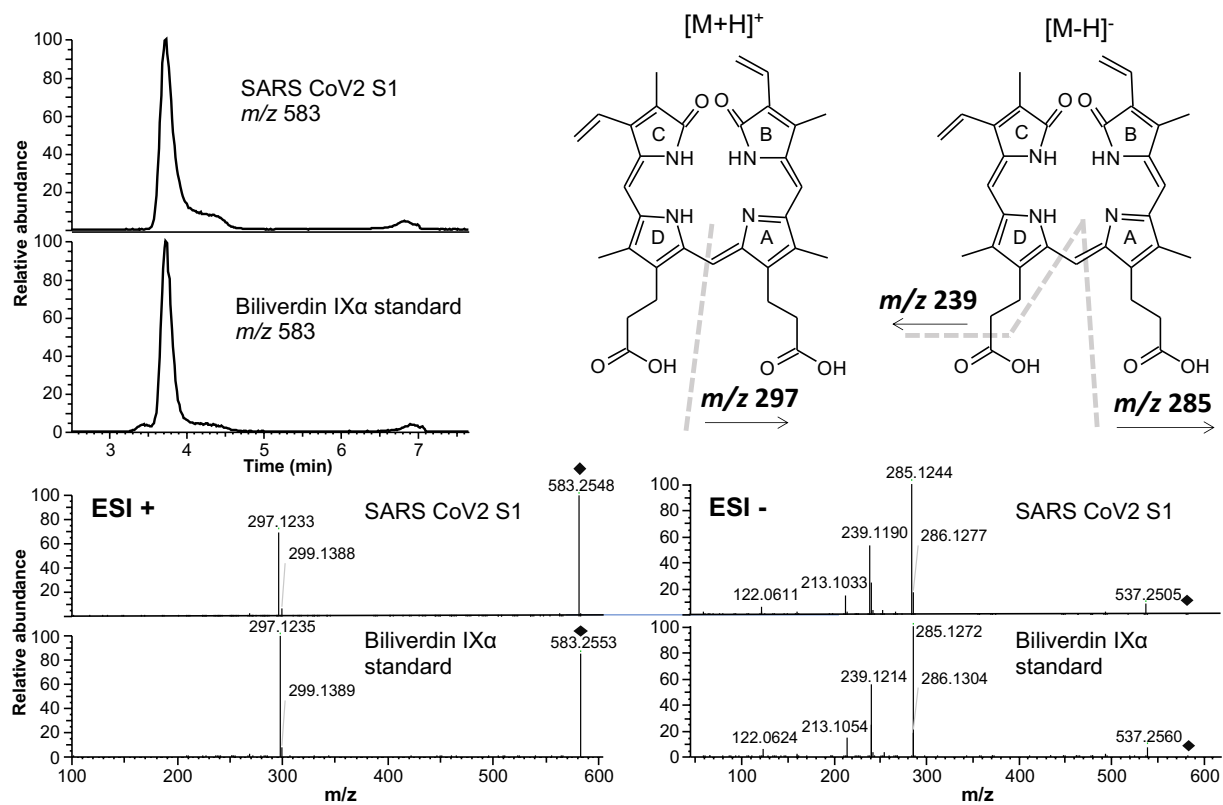

Supplementary Figure 3

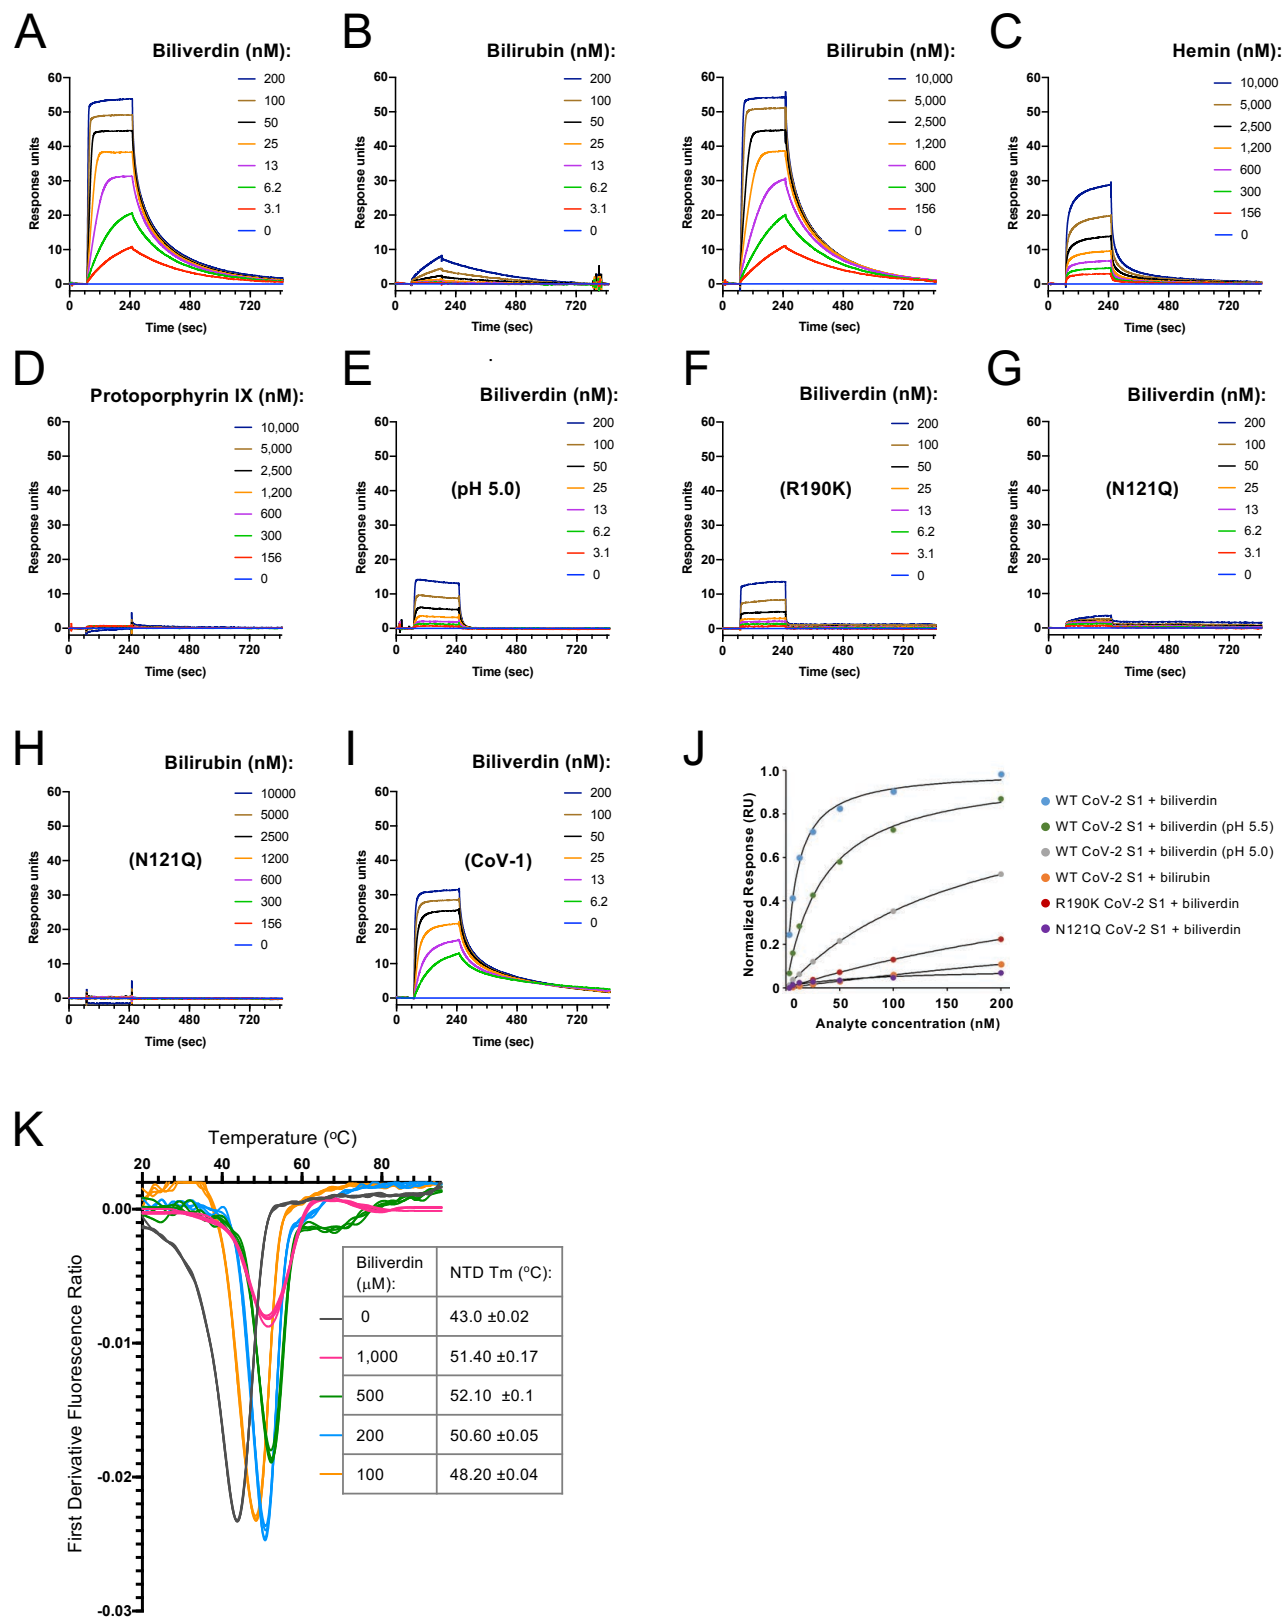

Supplementary Figure 4

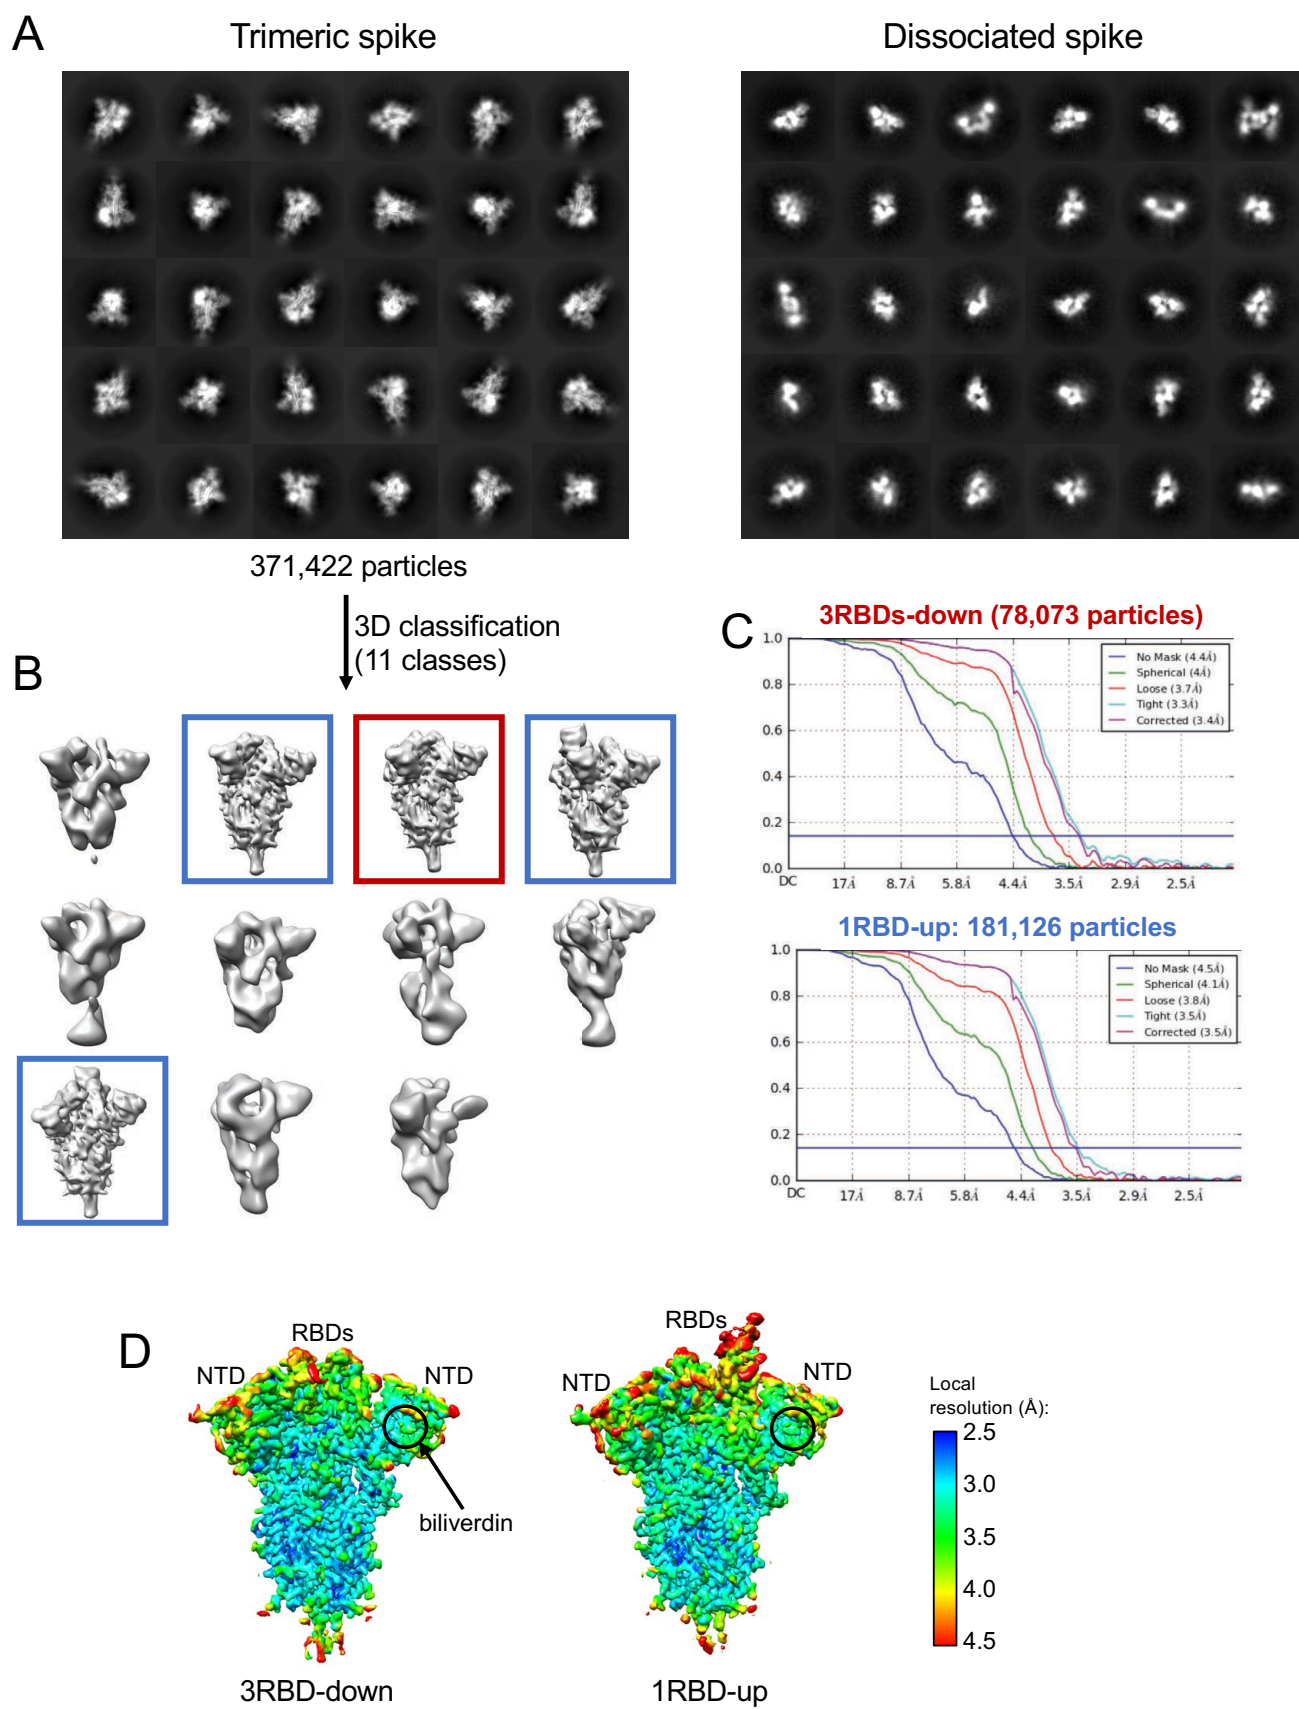

Supplementary Figure 5

A

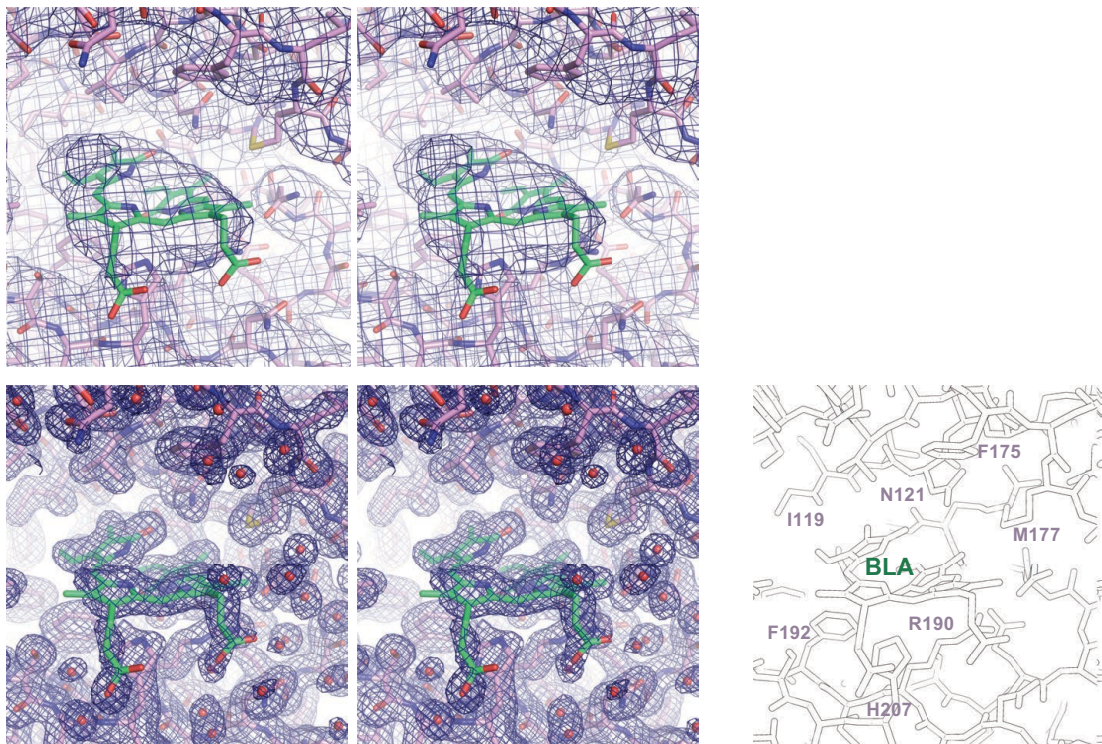

B

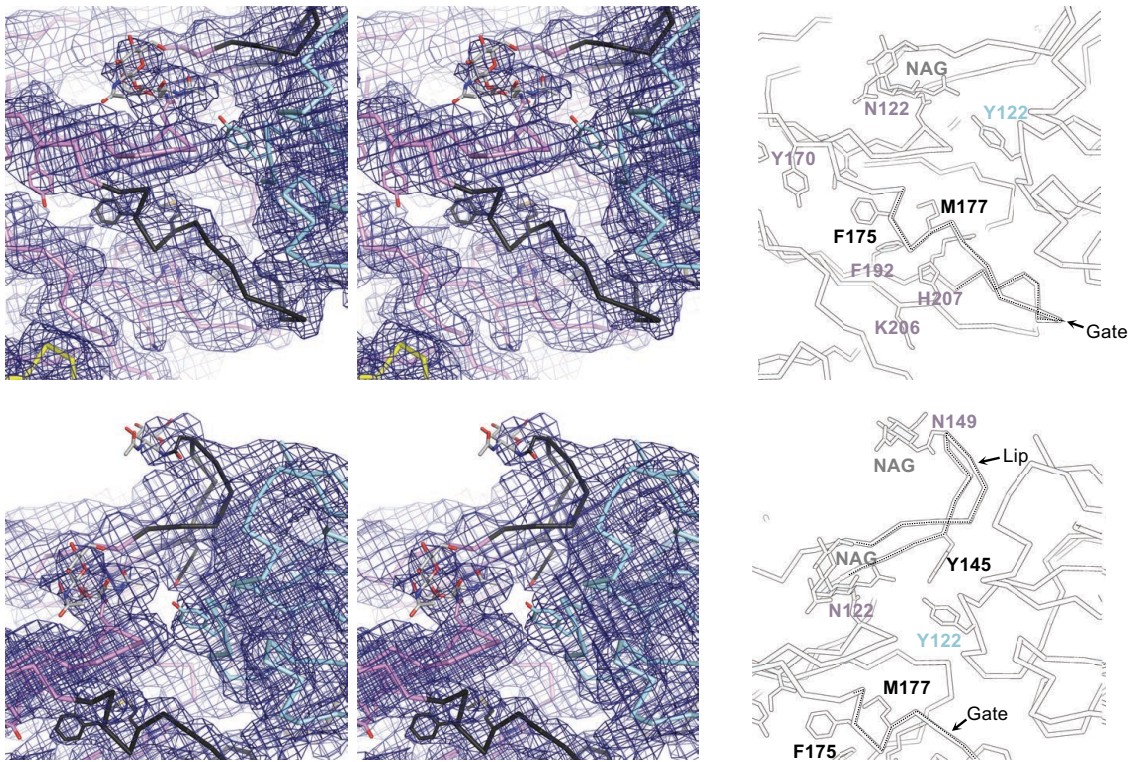

## Supplementary Figure 6

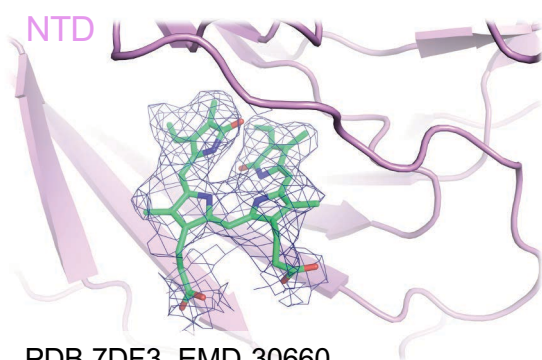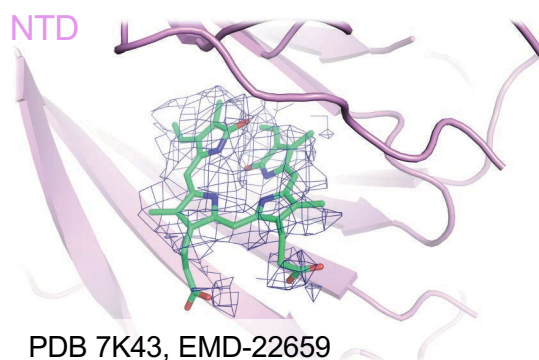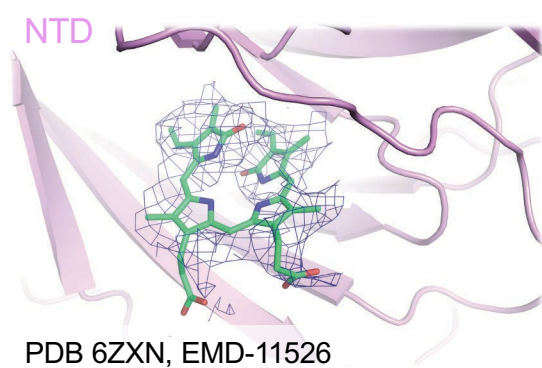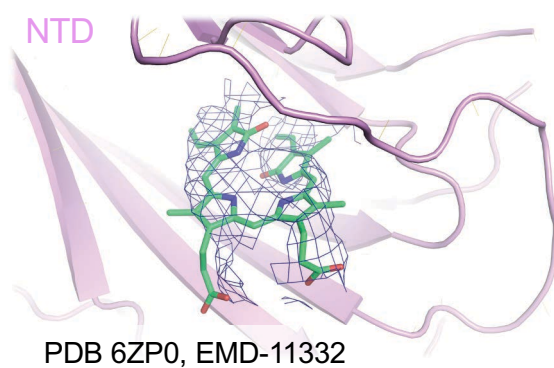

Supplementary Figure 7

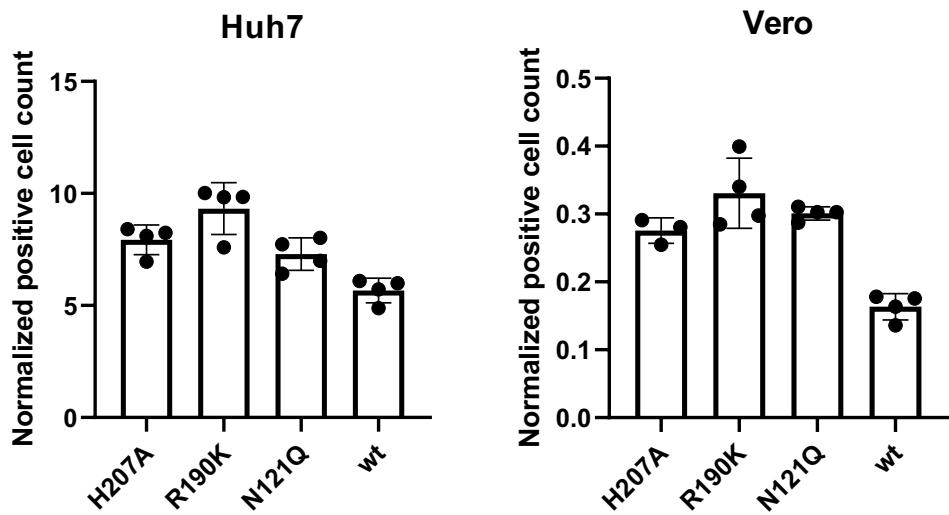

Supplementary Figure 8

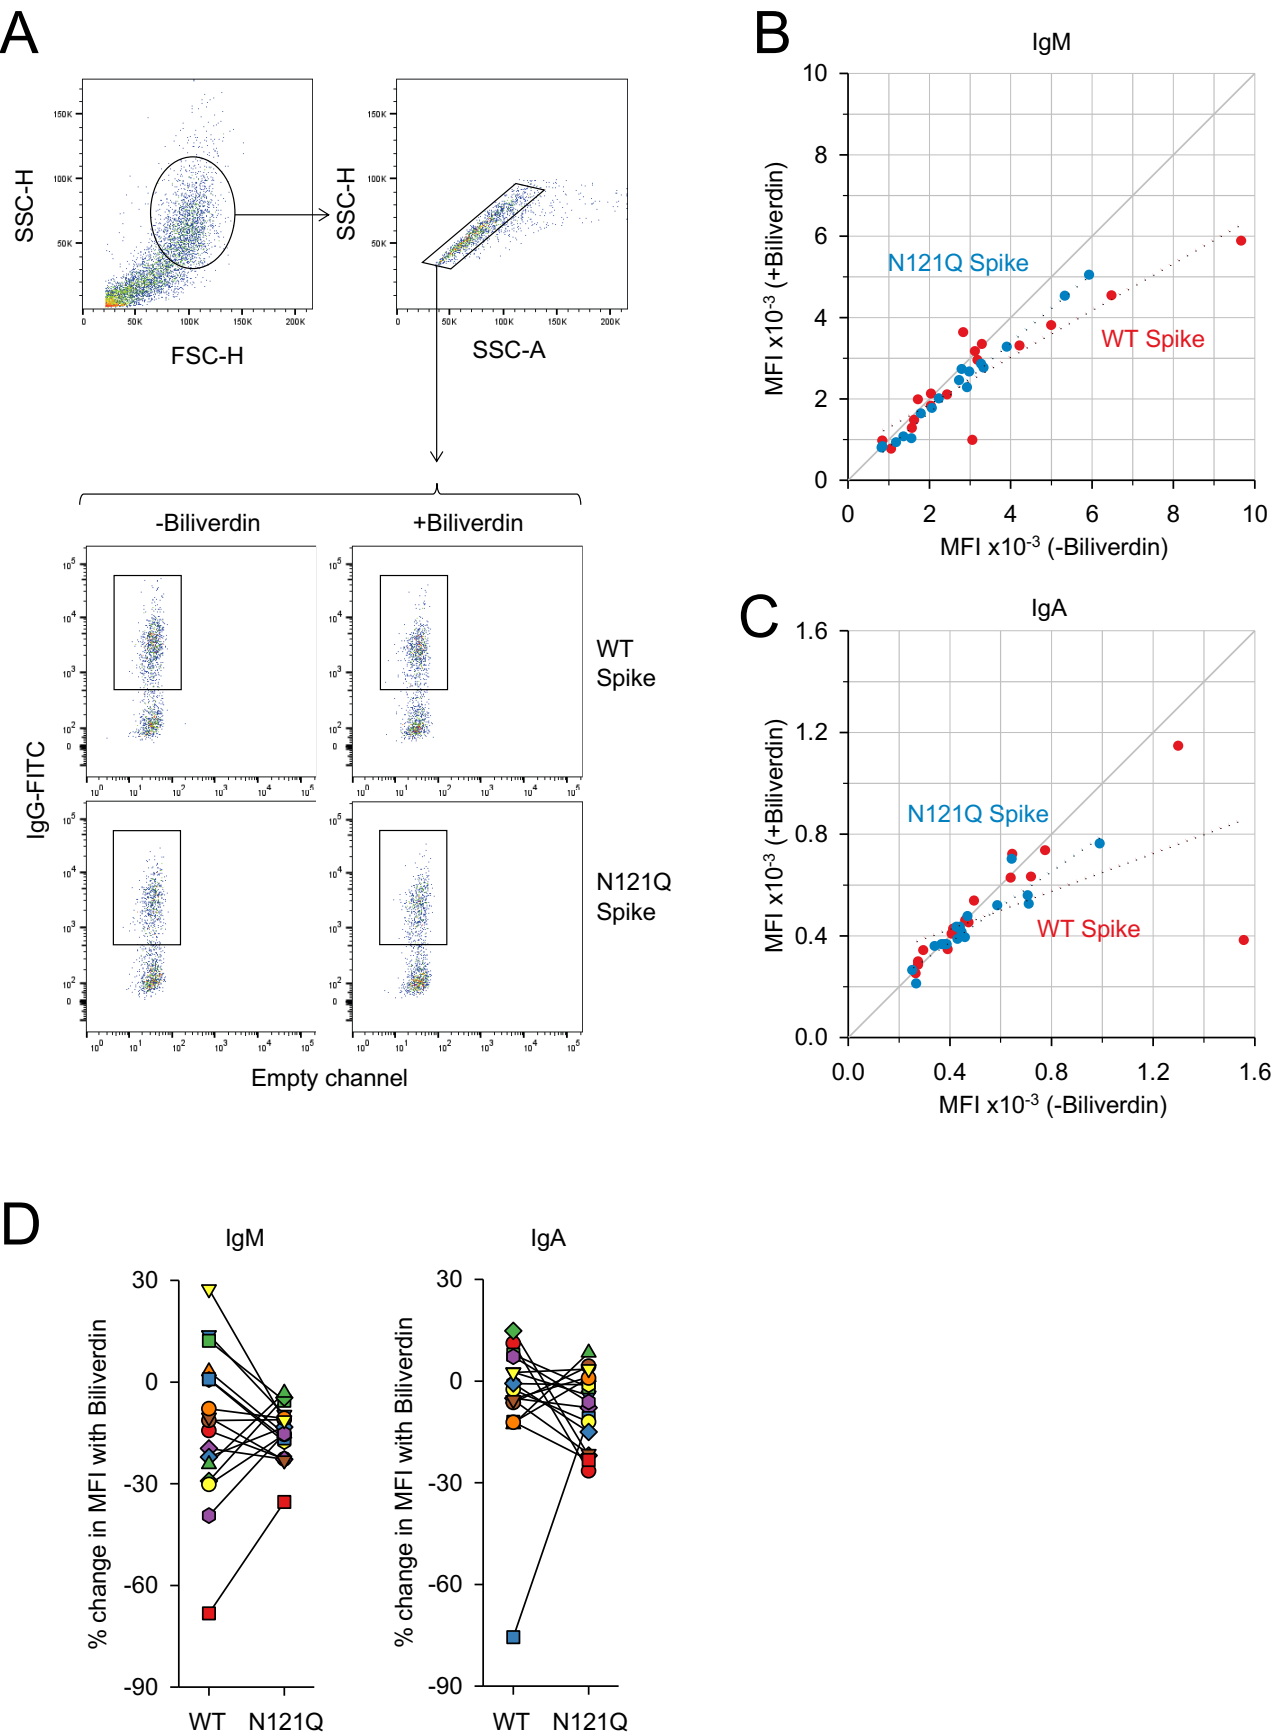

Supplementary Figure 9

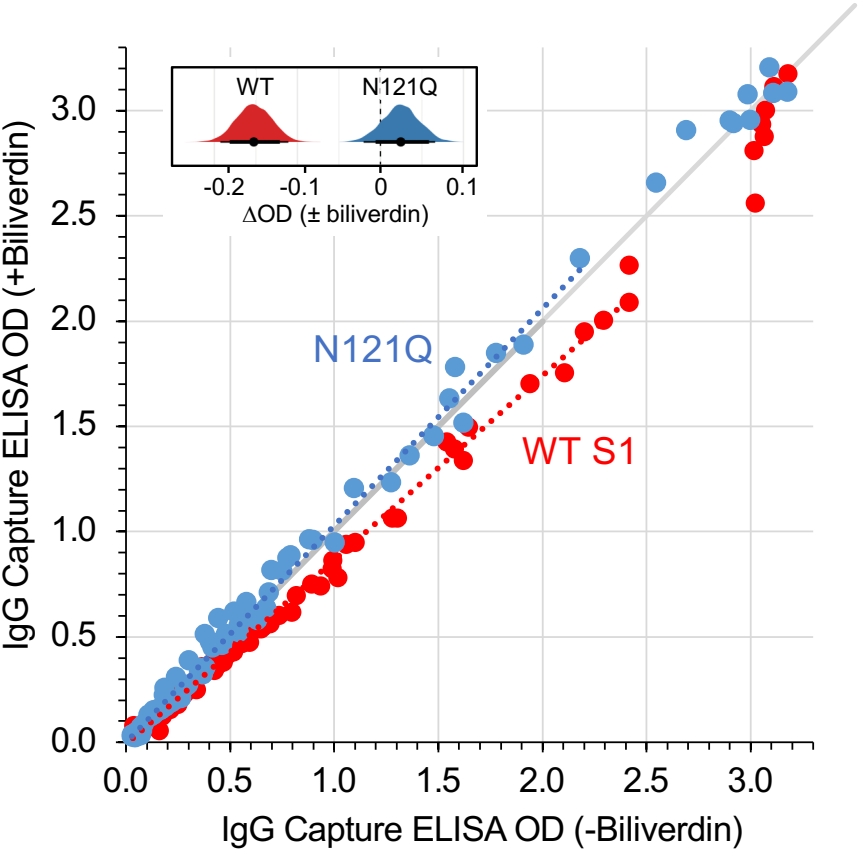

Supplementary Figure 10

A

|                  | COVA1-20 | COVA1-22 | COVA1-23 | COVA1-26 | COVA2-03 | COVA2-10 | COVA2-25 | COVA2-26 | COVA2-30 | COVA2-38 | COVA3-07 | P003_027 | P003_055 | P008_039 | P008_051 | P008_052 | P008_056 | COVA1-12 | COVA1-16 | COVA1-18 | COVA2-01 | COVA2-02 | COVA2-04 | COVA2-07 | COVA2-11 | COVA2-15 | COVA2-17 | COVA2-29 | COVA2-39 | COVA2-44 | COVA2-46 | P003_014 | P008_017 | P008_057 | P008_081 | P008_087 | P008_100 | P008_108 |
|------------------|----------|----------|----------|----------|----------|----------|----------|----------|----------|----------|----------|----------|----------|----------|----------|----------|----------|----------|----------|----------|----------|----------|----------|----------|----------|----------|----------|----------|----------|----------|----------|----------|----------|----------|----------|----------|----------|----------|
| ELISA AUC:       |          |          |          |          |          |          |          |          |          |          |          |          |          |          |          |          |          |          |          |          |          |          |          |          |          |          |          |          |          |          |          |          |          |          |          |          |          |          |
| WT (+biliverdin) | 3        | 2        | 1        | 1        | 44       | 39       | 50       | 2        | 42       | 2        | 15       | 38       | 33       | 43       | 38       | 39       | 2        | 39       | 48       | 35       | 28       | 44       | 44       | 70       | 71       | 48       | 3        | 50       | 39       | 50       | 39       | 36       | 37       | 39       | 41       | 43       | 42       | 40       |
| N121Q            | 31       | 18       | 23       | 28       | 61       | 73       | 46       | 19       | 33       | 29       | 53       | 37       | 32       | 44       | 39       | 39       | 16       | 42       | 44       | 37       | 34       | 47       | 47       | 69       | 63       | 49       | 29       | 51       | 73       | 51       | 45       | 39       | 40       | 43       | 40       | 45       | 43       | 40       |
| WT (-biliverdin) | 26       | 26       | 12       | 9        | 37       | 63       | 43       | 22       | 38       | 17       | 51       | 42       | 34       | 44       | 39       | 41       | 18       | 38       | 43       | 32       | 31       | 42       | 42       | 75       | 69       | 45       | 22       | 48       | 63       | 48       | 44       | 38       | 39       | 43       | 41       | 45       | 44       | 40       |
| Fold change:     |          |          |          |          |          |          |          |          |          |          |          |          |          |          |          |          |          |          |          |          |          |          |          |          |          |          |          |          |          |          |          |          |          |          |          |          |          |          |
| N121Q            | 9        | 8        | 22       | 28       | 1        | 2        | 1        | 8        | 1        | 16       | 4        | 1        | 1        | 1        | 1        | 1        | 7        | 1        | 1        | 1        | 1        | 1        | 1        | 1        | 1        | 1        | 12       | 1        | 2        | 1        | 1        | 1        | 1        | 1        | 1        | 1        | 1        | 1        |
| WT (-biliverdin) | 8        | 11       | 12       | 9        | 1        | 2        | 1        | 9        | 1        | 9        | 3        | 1        | 1        | 1        | 1        | 1        | 8        | 1        | 1        | 1        | 1        | 1        | 1        | 1        | 1        | 1        | 9        | 1        | 2        | 1        | 1        | 1        | 1        | 1        | 1        | 1        | 1        | 1        |

B

|          | Pseudotype  |                        |          |             |
|----------|-------------|------------------------|----------|-------------|
|          | N121Q Spike | WT Spike (+biliverdin) | WT Spike | Fold change |
| COVA2-17 | 0.31        | >30                    | 0.32     | >90         |
| COVA1-22 | 3.47        | >10                    | 0.02     | >600        |
| P008_056 | >100        | >100                   | >100     | n/a         |
| COVA1-18 | 0.01        | 0.01                   | 0.01     | 2           |

KEY

|             |             |      |        |       |
|-------------|-------------|------|--------|-------|
| IC50        | No activity | >1   | 0.1-1  | <0.01 |
| Fold change | 0-5         | 5-50 | 50-500 | >500  |

|          | SARS-CoV-2  |      |             |
|----------|-------------|------|-------------|
|          | +biliverdin | WT   | Fold change |
| COVA2-17 | 1.82        | 0.04 | 51          |
| COVA1-22 | 0.72        | 0.01 | 81          |
| P008_056 | 0.85        | 0.03 | 33          |
| P003_027 | 0.26        | 0.05 | 5           |

Supplementary Figure 11

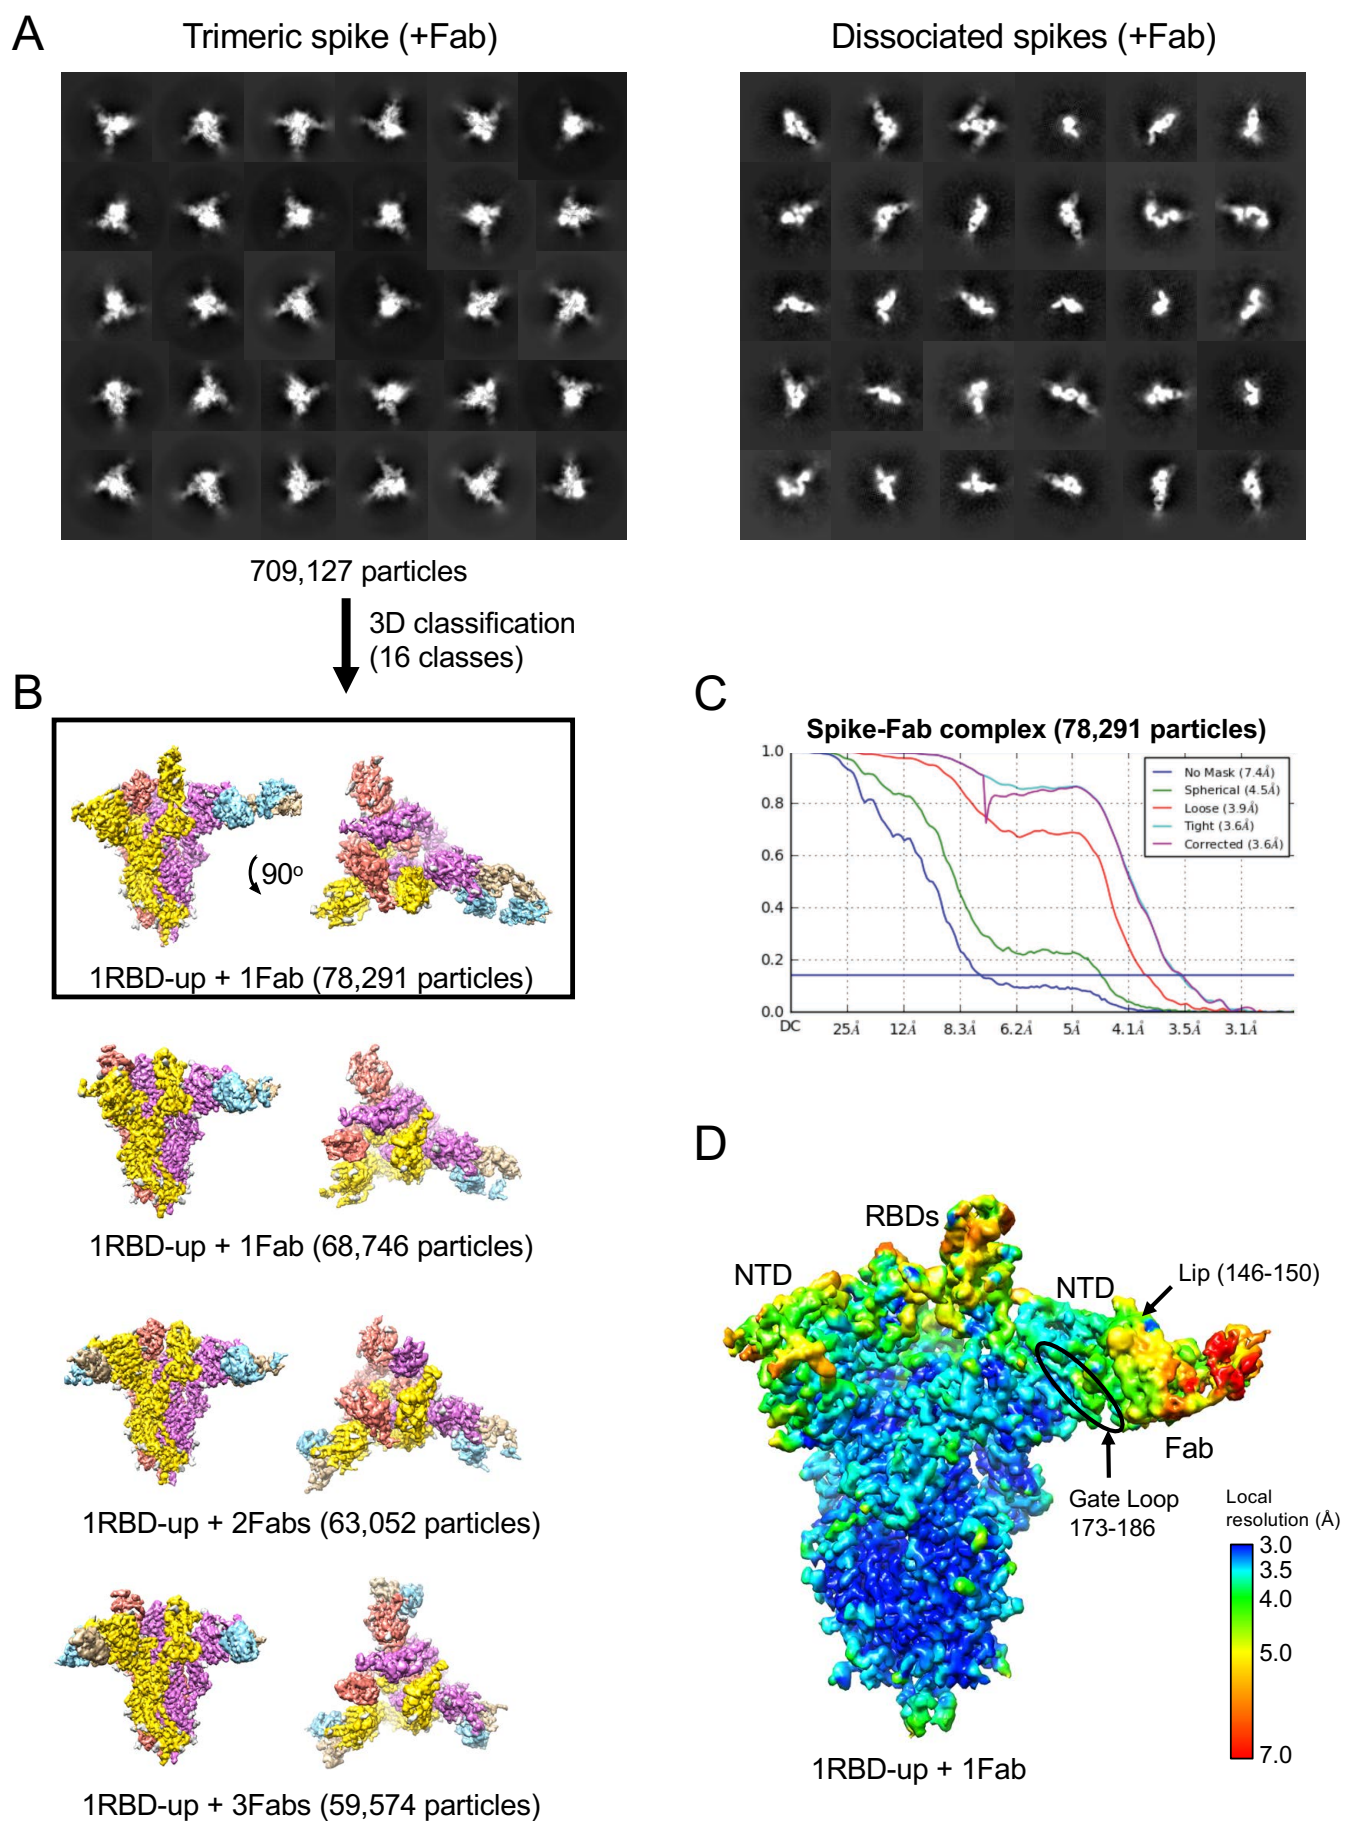

**Table S1.** Affinity of SARS CoV2 S1 interaction with tetrapyrroles measured using surface plasmon resonance.

| S1 protein   | Ligand         | Buffer <sup>1</sup>   | Kd (nM) <sup>2</sup> | Mean Kd (nM) <sup>3</sup> |
|--------------|----------------|-----------------------|----------------------|---------------------------|
| WT, CoV-2    | Biliverdin     | Hepes pH 8.0          | 8.0; 9.2             | 9.8 ±1.3                  |
| WT, CoV-2    | Biliverdin     | 1% DMSO, Hepes pH 8.0 | 10.6; 11.5           |                           |
| WT, CoV-2    | Biliverdin     | 1% DMSO, Hepes pH 7.0 | 13.5; 14.5           |                           |
| WT, CoV-2    | Biliverdin     | 1% DMSO, BTP pH 6.0   | 13.6; 14.2           |                           |
| WT, CoV-2    | Biliverdin     | 1% DMSO, BTP pH 5.5   | 34.5; 29.9           |                           |
| WT, CoV-2    | Biliverdin     | 1% DMSO, BT pH 5.0    | 186.8; 194.1; 358.5  | 250 ±100                  |
| WT, CoV-2    | Bilirubin      | 1% DMSO, Hepes pH 8.0 | 540; 620; 1,000      | 720 ±250                  |
| WT, CoV-2    | Hemin          | 1% DMSO, Hepes pH 8.0 | 5,800; 6,640; 8,200  | 7,000 ±1,200              |
| WT, CoV-2    | Protoporphyrin | 1% DMSO, Hepes pH 8.0 | >10,000              | `                         |
| WT, CoV-1    | Biliverdin     | Hepes pH 8.0          | 18.7; 19.6; 20.4     | 19.6 ±0.8                 |
| R190K, CoV-2 | Biliverdin     | Hepes pH 8.0          | 1,500; 2,230         |                           |
| N121Q, CoV-2 | Biliverdin     | Hepes pH 8.0          | 16,800; 19,200       |                           |
| N121Q, CoV-2 | Bilirubin      | 1% DMSO, Hepes pH 8.0 | >10,000              |                           |

<sup>1</sup>Running buffer variables (DMSO and pH) are shown; full composition is given in Methods section. BTP, BisTris Propane; BT, BisTris.

<sup>2</sup>Results of individual experiments performed in equilibrium mode.

<sup>3</sup>Mean and standard deviation shown for  $N > 2$  measurements.

**Table S2.** Cryo-EM data collection, refinement and validation statistics

|                                                     | SARS CoV-2 Spike<br>+ biliverdin |                   | SARS CoV-2 Spike<br>+ P008_056 Fab |
|-----------------------------------------------------|----------------------------------|-------------------|------------------------------------|
| Data collection                                     |                                  |                   |                                    |
| Magnification                                       | 128,440                          |                   | 36,232                             |
| Voltage (keV)                                       | 300                              |                   | 300                                |
| Electron exposure (e <sup>-</sup> /Å <sup>2</sup> ) | 33.6                             |                   | 51                                 |
| Defocus range (μm)                                  | -1.6 to -4                       |                   | -1.6 to -4                         |
| Pixel size (Å)                                      | 1.09                             |                   | 1.38                               |
| 3D reconstruction                                   |                                  |                   |                                    |
| Molecular assembly                                  | 3RBDs-down                       | 1RBD-up           | 1RBD-up + 1Fab                     |
| Initial particle images (no.)                       | 1,209,334                        | 1,209,334         | 2,505,265                          |
| Final particle images (no.)                         | 78,073                           | 181,126           | 78,291                             |
| Symmetry imposed                                    | C3                               | C1                | C1                                 |
| Map resolution (Å)                                  | 3.36                             | 3.5               | 3.6                                |
| FSC threshold                                       | 0.143                            | 0.143             | 0.143                              |
| Map resolution range (Å)                            |                                  |                   |                                    |
| Refinement                                          |                                  |                   |                                    |
| Model resolution (Å)                                | 3.36                             | 3.5               | 3.6                                |
| Model resolution range (Å)                          | 2.5-4.5                          | 2.5-6.0           | 3.0-7.0                            |
| Map sharpening <i>B</i> factor (Å <sup>2</sup> )    | -161                             | -156              | -66                                |
| Model composition                                   |                                  |                   |                                    |
| Nonhydrogen atoms                                   | 26,959                           | 26,805            | 30,006                             |
| Protein residues                                    | 3,261                            | 3,261             | 3,698                              |
| Ligands                                             | BLA: 3;<br>NAG: 84               | BLA: 3,<br>NAG:77 | BLA: 2,<br>NAG:79                  |
| <i>B</i> factors (Å <sup>2</sup> )                  |                                  |                   |                                    |
| Protein                                             | 56.84                            | 58.43             | 158.38                             |
| Ligand                                              | 94.84                            | 91.87             | 147.91                             |
| R.m.s. deviations                                   |                                  |                   |                                    |
| Bond lengths (Å)                                    | 0.003                            | 0.003             | 0.004                              |
| Bond angles (°)                                     | 0.521                            | 0.587             | 0.552                              |
| CC                                                  | 0.794                            | 0.793             | 0.82                               |
| Validation                                          |                                  |                   |                                    |
| MolProbity score                                    | 1.59                             | 1.66              | 1.84                               |
| Clashscore                                          | 6.08                             | 6.86              | 7.28                               |
| Poor rotamers (%)                                   | 0.00                             | 0.00              | 0.03                               |
| Ramachandran plot                                   |                                  |                   |                                    |
| Favored (%)                                         | 96.23                            | 95.8              | 93.11                              |
| Disallowed (%)                                      | 0                                | 0                 | 0.16                               |

**Table S3.** X-ray data collection and refinement statistics.

|                                                     | NTD with biliverdin                 |
|-----------------------------------------------------|-------------------------------------|
| <b>Data collection:</b>                             |                                     |
| Wavelength (Å)                                      | 1.00                                |
| Space group                                         | C222 <sub>1</sub>                   |
| <b>Unit cell parameters</b>                         |                                     |
| <i>a</i> , <i>b</i> , <i>c</i> (Å)                  | 98.07, 100.19, 85.97                |
| $\alpha$ , $\beta$ , $\gamma$ (°)                   | 90, 90, 90                          |
| Number of crystals used                             | 1                                   |
| Resolution (Å)                                      | 50.10-1.82 (1.87-1.82) <sup>a</sup> |
| <b>Number of reflections</b>                        |                                     |
| measured                                            | 510,757 (34,535)                    |
| unique                                              | 38,068 (2,758)                      |
| Completeness (%)                                    | 99.4 (98.6)                         |
| Multiplicity                                        | 13.4 (12.5)                         |
| $\langle I/\sigma(I) \rangle$                       | 12.4 (1.1)                          |
| <i>R</i> <sub>merge</sub> (%)                       | 0.166 (2.407)                       |
| <i>R</i> <sub>pim</sub> (%)                         | 0.048 (0.721)                       |
| CC 1/2                                              | 0.999 (0.408)                       |
| <b>Refinement statistics:</b>                       |                                     |
| Resolution range (Å)                                | 49.03-1.82 (1.885-1.82)             |
| <b>Number of reflections</b>                        |                                     |
| total                                               | 38,038 (3,741)                      |
| free                                                | 1,917 (165)                         |
| <i>R</i> <sub>work</sub> / <i>R</i> <sub>free</sub> | 0.1636/0.1997                       |
| <b>Number of atoms</b>                              |                                     |
| total                                               | 3,096                               |
| protein                                             | 2,511                               |
| ligands                                             | 234                                 |
| solvent                                             | 351                                 |
| <b>R.m.s. deviations from ideal</b>                 |                                     |
| bond lengths (Å)                                    | 0.01                                |
| bond angles (°)                                     | 1.0                                 |
| Average B-factor (Å <sup>2</sup> )                  | 32.76                               |
| Clash Score <sup>b</sup>                            | 5.32                                |
| Favored Rotamers <sup>b</sup>                       | 95.1                                |
| <b>Ramachandran plot (%) <sup>b</sup></b>           |                                     |
| favored                                             | 96.05                               |
| disallowed                                          | 0.00                                |

<sup>a</sup> Values in parentheses correspond to the highest resolution bin.

<sup>b</sup> Analyzed using MolProbity (<http://molprobity.biochem.duke.edu/>).
